# Supplementary material for: Multisensory gaze stabilization in response to subchronic alteration of vestibular type I hair cells
Source: eLife. 2023 Nov 29;12:RP88819. doi: 10.7554/eLife.88819 (PMC10686621; doi:10.7554/eLife.88819)
Supplement: Figure 1—source data 1. [file elife-88819-fig1-data1.xlsx]

## Sheet: VOR GAIN
Time (weeks)	WO					W2					W4					W6					W8					W10					W12
Frequency (Hz)	0.2	0.5	0.8	1	2	0.2	0.5	0.8	1	2	0.2	0.5	0.8	1	2	0.2	0.5	0.8	1	2	0.2	0.5	0.8	1	2	0.2	0.5	0.8	1	2	0.2	0.5	0.8	1	2
5280137	0.27	0.545	0.66	0.69	0.555	0.28	0.53	0.66	0.71	0.5	0.28	0.48	0.56	0.47	0.47	0.15	0.49	0.52	0.58	0.44	0.11	0.33	0.49	0.56	0.54	0.23	0.6	0.66	0.72	0.63	0.18	0.62	0.59	0.7	0.74
5280150	0.215	0.525	0.52	0.51	0.4	0.25	0.83	0.51	0.23	0.21	0.17	0.5	0.51	0.62	0.52	0.26	0.44	0.49	0.56	0.34	0.28	0.58	0.66	0.7	0.55	0.22	0.55	0.56	0.6	0.46	0.22	0.61	0.68	0.75	0.53
5280168	0.33	0.61	0.645	0.675	0.535	0.2	0.4	0.4	0.52	0.3	0.01	0.02	0	0	0.01	0.01	0.02	0.02	0.02	0.02	0	0	0.13	0.01	0.28	0.13	0.01	0.03	0.06	0.22	0.01	0.02	0.02	0.04	0.04
5280371	0.275	0.545	0.635	0.785	0.63	0.17	0.59	0.65	0.85	0.91	0.17	0.27	0.28	0.3	0.24	0.02	0.07	0.11	0.14	0.14	0.03	0.07	0.16	0.22	0.3	0.05	0.23	0.32	0.43	0.49	0.15	0.4	0.45	0.48	0.39
5280146	0.26	0.525	0.485	0.49	0.395	0.27	0.7	0.74	0.86	0.6	0.24	0.44	0.61	0.64	0.51	0.06	0.15	0.28	0.35	0.29	0.11	0.38	0.49	0.54	0.52	0.16	0.49	0.61	0.51	0.6	0.26	0.47	0.56	0.61	0.57
5280167	0.17	0.51	0.615	0.72	0.58	0.22	0.6	0.64	0.56	0.42	0.32	0.55	0.56	0.58	0.47	0.06	0.17	0.26	0.36	0.28	0.1	0.32	0.45	0.48	0.41	0.25	0.58	0.62	0.73	0.55	0.17	0.52	0.52	0.53	0.48
5280195	0.265	0.61	0.685	0.73	0.515	0.33	0.66	0.84	0.99	0.71	0.2	0.27	0.36	0.37	0.48	0.02	0.04	0.07	0.05	0.05	0.03	0.05	0.09	0.16	0.23	0.05	0.15	0.23	0.34	0.53	0.14	0.22	0.31	0.35	0.35
5280164	0.21	0.57	0.695	0.82	0.72	0.2	0.51	0.62	0.71	0.63	0.03	0.06	0.09	0.09	0.09	0	0	0.01	0.01	0.01	0.01	0.02	0	0.06	0.02	0	0.04	0.06	0.06	0.04	0.02	0.03	0.02	0.09	0.17
5280133	0.175	0.47	0.6	0.675	0.575	0.38	0.77	0.67	0.76	0.56	0.37	0.64	0.72	0.81	0.63	0.17	0.3	0.37	0.38	0.27	0.1	0.27	0.39	0.42	0.32	0.25	0.52	0.62	0.76	0.61	0.18	0.51	0.73	0.79	0.5
5280144	0.335	0.59	0.665	0.695	0.6	0.13	0.35	0.42	0.44	0.37	0.1	0.19	0.21	0.3	0.23	0.01	0.03	0.02	0.07	0.02	0.01	0.03	0.03	0.02	0.01	0.18	0.03	0.09	0.03	0.04	0.03	0.01	0.02	0.04	0.14
5280266	0.23	0.44	0.495	0.585	0.425	0.24	0.57	0.61	0.75	0.42	0.09	0.14	0.26	0.33	0.4	0.01	0.02	0.04	0.1	0.13	0.01	0.01	0.07	0.06	0.13	0.01	0.11	0.24	0.26	0.3	0.03	0.1	0.25	0.23	0.26
5280325	0.08	0.48	0.45	0.51	0.515	0.28	0.48	0.51	0.51	0.45	0.04	0.12	0.13	0.12	0.13	0	0.01	0.04	0.03	0.12	0.01	0	0.03	0.02	0.09	0.02	0.03	0.04	0.17	0.3	0.06	0.06	0.12	0.23	0.23
001910	0.18	0.36	0.34	0.25	0.46	0.25	0.53	0.66	0.81	0.89	0.13	0.41	0.49	0.74	0.74	0.05	0.19	0.21	0.33	0.5	0.06	0.18	0.26	0.46	0.58	0.19	0.34	0.43	0.55	0.72	0.17	0.46	0.51	0.53	0.68
001911	0.22	0.4	0.43	0.72	0.78	0.38	0.59	0.51	0.59	0.8	0.09	0.28	0.44	0.45	0.4	0.01	0.03	0.04	0.06	0.1	0.03	0.09	0.13	0.14	0.25	0.09	0.33	0.38	0.69	0.78	0.28	0.52	0.56	0.6	0.72
001912	0.19	0.38	0.49	0.54	0.67	0.18	0.56	0.61	0.64	0.99	0.09	0.41	0.41	0.41	0.44	0	0.08	0.11	0.1	0.14	0.02	0.07	0.15	0.15	0.37	0.02	0.06	0.4	0.32	0.41	0.02	0.24	0.27	0.4	0.56
001914	0.29	0.49	0.28	0.52	0.69	0.29	0.54	0.5	0.54	0.93	0.07	0.17	0.38	0.55	1.02	0	0.03	-0.04	0.05	0.03	0	0.04	0.05	0.09	0.18	0.01	0.02	0.09	0.1	0.41	0.01	0.06	0.1	0.24	0.41
001915	0.22	0.36	0.53	0.5	0.78	0.1	0.42	0.44	0.61	0.9	0.09	0.3	0.46	0.53	0.54	0.01	0.03	0.07	0.17	0.29	0.01	0.05	0.31	0.27	0.48	0.08	0.31	0.36	0.55	0.74	0.16	0.28	0.3	0.36	0.61
017490	0.37	0.57	0.53	0.65	0.76	0.31	0.66	0.69	0.87	0.95	0.13	0.38	0.48	0.51	0.71	0.08	0.35	0.49	0.63	0.78	0.05	0.2	0.37	0.56	0.71	0.02	0.4	0.41	0.44	0.78	0.05	0.31	0.48	0.69	1.05
017492	0.35	0.6	0.55	0.6	0.73	0.27	0.57	0.7	0.68	0.92	0.11	0.35	0.58	0.64	0.82	0.03	0.11	0.16	0.17	0.24	0.04	0.17	0.31	0.36	0.57	0.04	0.23	0.33	0.45	0.58	0.14	0.31	0.4	0.48	0.72
017494	0.16	0.44	0.45	0.58	0.7	0.23	0.66	0.69	0.89	0.91	0.1	0.14	0.24	0.27	0.23	0.03	0.04	0.06	-0.05	0.04	0.01	0.06	0.04	0.15	0.21	0.01	0.05	0.11	0.17	0.39	0.01	0.06	0.15	0.19	0.45
018360	0.13	0.36	0.41	0.54	0.49	0.06	0.36	0.46	0.55	0.64	0.16	0.37	0.65	0.58	0.86	0.19	0.34	0.39	0.37	0.54	0.15	0.41	0.61	0.64	0.67	0.14	0.42	0.53	0.76	1.01	0.19	0.47	0.48	0.54	0.66
5280317	0.26	0.575	0.55	0.46	0.405	0.18	0.4	0.47	0.36	0.43	0.23	0.53	0.57	0.48	0.45	0.29	0.56	0.61	0.61	0.37	0.22	0.56	0.58	0.65	0.46	0.34	0.71	0.68	0.75	0.61	0.29	0.63	0.69	0.71	0.58
5280263	0.175	0.43	0.55	0.645	0.555	0.33	0.67	0.7	0.7	0.56	0.35	0.68	0.68	0.75	0.63	0.33	0.51	0.64	0.56	0.38	0.42	0.75	0.8	0.84	0.71	0.34	0.73	0.81	0.87	0.71	0.27	0.72	0.78	0.76	0.51
5280255	0.29	0.59	0.695	0.745	0.51	0.35	0.67	0.77	0.86	0.6	0.31	0.61	0.67	0.74	0.59	0.42	0.77	0.8	0.81	0.53	0.26	0.49	0.64	0.72	0.51	0.33	0.7	0.78	0.87	0.69	0.3	0.59	0.69	0.9	0.6
5280254	0.2	0.49	0.625	0.62	0.51	0.4	0.55	0.64	0.66	0.52	0.35	0.72	0.71	0.76	0.58	0.3	0.59	0.65	0.71	0.61	0.28	0.66	0.72	0.78	0.55	0.34	0.79	0.83	0.88	0.73	0.29	0.61	0.72	0.81	0.66
5280136	0.3	0.465	0.585	0.735	0.625	0.42	0.75	0.67	0.71	0.53	0.43	0.71	0.74	0.81	0.56	0.37	0.67	0.73	0.64	0.5	0.34	0.76	0.83	0.88	0.96	0.29	0.64	0.69	0.81	0.79	0.36	0.7	0.79	0.87	0.54
5280172	0.255	0.515	0.61	0.665	0.545	0.38	0.66	0.76	0.83	0.59	0.26	0.54	0.6	0.63	0.51	0.23	0.61	0.74	0.79	0.64	0.29	0.67	0.71	0.92	0.83	0.19	0.56	0.64	0.66	0.58	0.26	0.76	0.89	1.07	1.11
5280199	0.175	0.44	0.705	0.63	0.525	0.21	0.53	0.63	0.75	0.55	0.29	0.59	0.69	0.73	0.51	0.39	0.7	0.71	0.64	0.59	0.33	0.61	0.79	0.81	0.77	0.25	0.69	0.71	0.63	0.68	0.29	0.61	0.65	0.61	0.47
5280256	0.195	0.51	0.65	0.695	0.555	0.16	0.64	0.64	0.69	0.48	0.34	0.72	0.77	0.78	0.52	0.38	0.66	0.75	0.82	0.57	0.25	0.61	0.71	0.78	0.64	0.41	0.8	0.81	0.9	0.73	0.34	0.79	0.87	0.94	0.76
5280234	0.23	0.525	0.545	0.67	0.43	0.15	0.49	0.48	0.55	0.44	0.35	0.65	0.57	0.45	0.35	0.41	0.76	0.77	0.88	0.78	0.39	0.73	0.76	0.74	0.61	0.22	0.49	0.36	0.4	0.32	0.42	0.77	0.78	0.74	0.63
5280250	0.165	0.425	0.505	0.57	0.425	0.25	0.53	0.56	0.59	0.46	0.35	0.66	0.64	0.67	0.54	0.52	0.51	0.57	0.5	0.28	0.3	0.64	0.57	0.68	0.51	0.24	0.56	0.56	0.61	0.48	0.11	0.39	0.5	0.47	0.49
528251	0.215	0.48	0.565	0.575	0.405	0.29	0.53	0.6	0.66	0.55	0.33	0.69	0.68	0.89	0.54	0.25	0.43	0.57	0.54	0.36	0.24	0.45	0.53	0.54	0.43	0.28	0.54	0.62	0.58	0.48	0.37	0.74	0.81	0.91	0.73
5280285	0.245	0.48	0.61	0.7	0.43	0.17	0.47	0.51	0.55	0.58	0.16	0.48	0.53	0.42	0.4	0.43	0.51	0.59	0.78	0.79	0.28	0.62	0.58	0.63	0.5	0.36	0.77	0.76	0.81	0.53	0.17	0.5	0.6	0.68	0.57
016859	0.31	0.61	0.62	0.7	0.67	0.28	0.63	0.55	0.67	0.82	0.34	0.53	0.51	0.81	1.04	0.3	0.64	0.65	0.8	0.94	0.42	0.57	0.74	0.81	1.01	0.38	0.79	0.72	0.63	0.82	0.25	0.65	0.65	0.87	1.02
016860	0.26	0.69	0.52	0.62	0.62	0.25	0.61	0.56	0.73	0.8	0.26	0.74	0.81	0.83	0.99	0.27	0.5	0.56	0.67	0.96	0.12	0.51	0.54	0.67	0.76	0.25	0.67	0.75	0.71	0.87	0.23	0.58	0.6	0.63	0.54
016861	0.26	0.69	0.7	0.67	0.66	0.24	0.63	0.67	0.7	1.11	0.2	0.77	0.86	0.78	0.87	0.38	0.5	0.62	0.73	1.02	0.18	0.59	0.62	0.65	0.72	0.16	0.57	0.63	0.76	0.92	0.38	0.78	0.82	0.9	1.01
016862	0.35	0.62	0.54	0.63	0.6	0.32	0.58	0.56	0.72	0.92	0.27	0.64	0.64	0.73	0.92	0.34	0.83	0.63	0.85	0.82	0.25	0.75	0.68	0.81	0.83	0.16	0.49	0.65	0.81	0.99	0.26	0.47	0.64	0.53	0.76
018027	0.37	0.63	0.62	0.62	0.85	0.35	0.71	0.61	0.57	0.5	0.1	0.3	0.45	0.62	0.79	0.19	0.41	0.44	0.57	0.68	0.06	0.31	0.52	0.54	1.02	0.2	0.42	0.57	0.78	0.96	0.11	0.58	0.46	0.62	0.73
018028	0.27	0.63	0.73	0.71	0.82	0.22	0.53	0.5	0.54	0.74	0.22	0.57	0.55	0.73	0.66	0.2	0.51	0.54	0.69	0.53	0.09	0.3	0.34	0.75	1.13	0.12	0.48	0.54	0.68	1	0.09	0.5	0.61	0.48	0.72
018029	0.21	0.81	0.47	0.53	0.82	0.39	0.61	0.6	0.81	0.88	0.18	0.45	0.56	0.52	0.74	0.31	0.38	0.76	0.78	0.97	0.18	0.48	0.58	0.56	0.85	0.14	0.37	0.58	0.7	0.73	0.26	0.6	0.57	0.75	0.9
018032	0.17	0.38	0.22	0.42	0.55	0.15	0.3	0.36	0.42	0.81	0.22	0.48	0.46	0.79	0.71	0.27	0.39	0.51	0.67	0.85	0.23	0.69	0.57	0.65	0.97	0.25	0.54	0.62	0.76	0.89	0.14	0.36	0.45	0.53	0.8
018033	0.27	0.43	0.48	0.49	0.64	0.25	0.48	0.51	0.58	0.72	0.17	0.48	0.7	0.77	0.92	0.26	0.58	0.59	0.72	0.84	0.19	0.36	0.47	0.58	0.96	0.07	0.41	0.5	0.62	0.71	0.09	0.38	0.43	0.55	0.58
018034	0.25	0.42	0.46	0.56	0.77	0.25	0.38	0.55	0.72	1.03	0.18	0.5	0.52	0.56	0.71	0.13	0.38	0.53	0.52	0.64	0.14	0.45	0.6	0.57	0.32	0.14	0.43	0.54	0.75	0.89	0.16	0.37	0.48	0.5	0.68

## Sheet: VOR PHASE
Time (weeks)	WO					W2					W4					W6					W8					W10					W12
Frequency (Hz)	0.2	0.5	0.8	1	2	0.2	0.5	0.8	1	2	0.2	0.5	0.8	1	2	0.2	0.5	0.8	1	2	0.2	0.5	0.8	1	2	0.2	0.5	0.8	1	2	0.2	0.5	0.8	1	2
5280137	26.532	14.4	5.616	2.16	-16.56	31.968	26.46	12.96	10.8	-14.4	46.728	22.32	8.64	12.24	-16.56	45.936	31.32	13.536	6.48	-20.88	69.84	50.4	29.664	25.56	-7.2	36.144	24.3	14.4	8.64	-14.4	41.76	24.84	11.232	6.48	-20.16
5280150	39.096	15.57	1.872	4.68	-19.8	44.856	20.52	9.792	5.76	-9.36	55.944	32.76	15.84	7.56	-15.12	46.44	26.82	12.672	4.32	-15.12	48.816	24.48	11.808	8.28	-19.44	58.68	25.56	15.552	7.92	-15.84	59.76	26.28	11.232	4.68	-17.28
5280168	24.696	14.49	4.896	0.72	-19.44	37.368	37.44	7.2	7.92	-18	4.608	-15.3	-2.88	71.64	2.88	5.04	47.16	129.888	-77.4	137.52	-19.296	3.96	123.552	80.64	-45.36	-136.44	-202.5	-24.192	89.64	-38.88	-67.824	145.26	-59.904	54.36	-144.72
5280371	32.112	16.02	3.456	0.36	-22.32	47.952	31.5	8.064	1.8	-22.32	50.544	34.38	17.28	12.6	-12.96	80.28	66.78	65.088	39.96	-10.08	78.984	91.62	72.576	56.52	2.88	93.672	66.42	48.672	33.48	0.72	59.76	42.84	23.616	17.28	-17.28
5280146	35.784	12.42	2.88	2.16	-23.04	35.352	17.64	6.912	1.8	-18	24.12	18.36	5.76	2.16	-18.72	53.64	51.12	30.528	22.32	-7.92	43.992	31.32	16.128	12.6	-20.88	37.584	27.36	16.704	10.08	-17.28	47.52	30.96	17.856	11.88	-12.96
5280167	39.132	16.47	6.768	0.18	-23.76	56.16	32.04	12.96	10.08	-10.08	32.04	21.96	8.64	1.44	-28.08	69.12	58.86	28.8	19.8	-10.08	67.32	54.72	32.256	16.56	-12.24	50.328	37.26	20.448	10.8	-12.24	66.456	35.1	17.28	9.72	-16.56
5280195	30.348	16.92	4.176	-3.6	-21.24	38.952	25.56	8.064	3.24	-12.96	44.136	36.72	28.8	24.84	-3.6	52.056	69.3	45.216	39.6	0.72	60.408	88.56	85.536	63	10.08	57.168	66.6	66.528	48.24	2.16	71.712	45.36	30.24	24.12	-6.48
5280164	41.904	15.93	2.448	-1.44	-23.76	48.312	30.24	16.704	9	-12.96	72	57.78	59.328	28.44	-12.96	81.792	90	131.04	21.24	23.04	21.456	-19.8	60.192	71.64	22.32	138.312	71.28	112.32	77.04	37.44	132.912	168.3	65.088	90.36	-10.8
5280133	50.4	19.26	8.928	3.24	-23.4	24.552	11.7	1.152	-2.52	-16.56	26.136	18	9.504	-1.44	-23.04	63.288	42.3	26.496	19.44	-12.96	70.632	55.44	35.136	29.16	-20.88	55.224	45.72	22.752	14.4	-15.12	49.032	33.3	19.872	13.32	-12.96
5280144	38.88	20.52	2.88	-2.16	-19.8	43.632	23.22	16.992	12.96	-13.68	61.272	34.38	31.104	16.92	-18	-39.888	120.96	38.016	81.72	4.32	43.272	26.82	148.608	30.24	-26.64	4.248	-82.44	-101.664	139.32	13.68	51.624	107.46	144.288	133.56	32.4
5280266	35.1	20.25	3.456	-0.9	-21.6	47.736	16.56	6.912	4.68	-15.12	42.048	52.74	37.728	28.08	-15.12	57.24	67.86	69.984	96.84	-11.52	3.168	96.48	72	64.08	3.6	109.872	92.52	59.04	54.72	0.72	81.216	58.5	50.976	41.76	-4.32
5280325	31.464	10.53	1.872	-2.16	-26.28	23.832	18.9	14.4	2.16	-10.08	44.64	56.7	32.832	13.32	-15.84	167.328	38.88	34.848	-5.04	-45.36	0.072	-60.48	200.736	158.4	-84.96	-80.136	41.94	80.64	62.64	-15.84	-72	96.48	86.112	56.52	-1.44
001910	20.592	6.48	-1.44	-5.76	-34.56	24.768	15.3	5.76	1.44	-22.32	20.088	10.62	6.336	-2.52	-22.32	41.472	35.1	33.696	19.8	-23.04	39.96	29.52	23.616	13.68	-23.76	30.096	18.18	12.096	4.32	-25.2	53.928	21.6	10.368	4.68	-20.16
001911	13.32	4.14	-2.016	-2.16	-15.12	35.352	14.4	3.168	-2.52	-25.2	54.144	28.62	9.504	9.72	-20.88	7.92	51.3	61.92	30.24	-11.52	84.672	74.34	59.904	31.32	-18.72	49.32	44.46	40.032	15.12	-15.12	28.728	24.66	9.216	2.88	-26.64
001912	32.976	10.08	0.864	-5.4	-26.64	57.096	24.84	12.672	5.76	-18	43.056	27.72	14.112	9	-20.16	52.272	3.6	22.464	25.56	-15.84	108	86.4	71.136	52.92	-13.68	102.096	55.08	37.728	30.24	0	99.36	40.14	45.792	36.72	-5.76
001914	7.992	7.02	-0.288	1.8	-25.2	37.584	21.6	9.504	-1.44	-22.32	54.864	54.18	38.304	29.52	-15.12	9.288	68.4	42.912	65.16	30.96	-15.192	90	82.656	84.6	2.16	37.368	90	108.576	59.04	12.24	94.824	90	97.344	52.92	12.96
001915	26.856	14.22	2.88	1.44	-23.76	54.72	29.88	10.08	8.64	-22.32	44.856	29.52	14.4	9.36	-22.32	90.72	81.9	71.136	48.96	-6.48	86.544	51.48	37.728	15.84	-12.96	58.104	36.54	23.616	11.88	-18.72	36.72	34.74	33.696	27	-8.64
017490	14.472	-1.8	-1.44	-0.36	-32.4	33.048	18.9	8.352	0.36	-16.56	44.352	23.04	21.6	6.12	-25.2	76.608	60.3	24.192	9.36	-24.48	76.464	74.52	37.152	33.48	-11.52	59.976	45.9	33.12	22.32	-12.96	25.56	39.96	33.408	17.64	-12.96
017492	21.744	7.02	0	0	-34.56	43.056	11.34	6.048	1.08	-21.6	34.92	17.64	8.928	2.88	-21.6	91.08	57.6	35.424	28.44	-17.28	87.84	63	48.384	12.96	-22.32	63.648	48.42	33.12	24.12	-18	76.032	35.64	30.528	19.44	-14.4
017494	29.16	11.7	5.472	1.8	-29.52	34.416	14.94	4.032	-0.72	-30.24	63.72	41.04	17.568	14.4	-21.6	108	74.7	57.888	40.32	-19.44	81.072	79.56	57.6	76.68	-2.88	58.32	90	66.816	56.52	-3.6	67.464	80.28	74.88	54.72	2.88
018360	28.512	5.22	-0.864	-6.12	-28.8	13.032	7.56	-1.152	-8.64	-23.76	13.032	15.12	2.88	-3.24	-25.92	47.448	22.5	17.28	6.84	-17.28	43.992	34.2	13.824	2.16	-23.76	49.032	25.92	12.96	6.84	-19.44	46.224	23.76	6.624	6.84	-19.44
5280317	27.288	5.31	-5.328	-6.66	-16.92	37.152	21.06	2.016	-1.08	-26.64	23.256	10.44	3.456	-6.48	-23.04	24.768	10.44	0	-2.88	-24.48	43.632	20.16	9.504	2.88	-19.44	39.816	16.56	8.928	1.08	-20.16	40.896	21.6	8.064	1.44	-20.16
5280263	44.064	19.17	6.48	1.26	-21.6	25.416	12.06	2.592	-2.16	-22.32	19.368	13.14	4.32	-3.24	-19.44	22.536	7.74	0.864	-5.04	-28.8	28.8	13.32	2.304	-2.88	-25.2	42.768	21.96	9.504	7.56	-18.72	37.944	23.58	9.504	6.12	-20.16
5280255	35.316	11.88	-0.288	-3.6	-23.04	19.224	14.58	3.168	-3.6	-21.6	16.776	20.16	8.064	2.88	-19.44	20.952	10.98	-2.592	-7.56	-25.92	31.104	31.68	-0.576	-5.4	-24.48	32.544	16.2	5.184	-0.72	-22.32	40.464	24.48	6.912	2.16	-21.6
5280254	36.648	24.75	5.328	1.26	-17.28	16.416	3.78	-2.88	-4.68	-22.32	24.336	13.32	6.624	3.24	-17.28	40.464	16.74	9.792	5.4	-18	34.992	19.8	8.928	2.88	-18.72	35.64	16.38	6.336	0	-22.32	29.952	18.9	11.232	3.24	-19.44
5280136	27.54	12.51	4.032	-2.34	-22.32	19.44	7.02	-1.728	-3.6	-21.6	22.68	13.14	4.608	-1.8	-20.88	20.448	7.2	1.44	-6.12	-23.04	31.464	12.6	4.032	-2.16	-24.48	25.488	16.2	5.472	-6.84	-25.92	38.664	14.58	6.912	0.36	-20.88
5280172	38.952	27.18	7.344	0.9	-20.52	20.736	13.5	4.896	0.36	-23.04	27.504	10.8	1.44	0	-23.76	31.032	14.4	9.792	0	-19.44	38.16	17.64	5.76	-0.36	-27.36	25.344	19.62	8.928	1.08	-20.88	34.776	16.56	6.912	1.44	-23.04
5280199	31.32	20.79	4.752	1.62	-17.64	34.848	21.42	10.368	6.12	-18	23.04	11.88	4.896	-2.52	-23.76	21.744	5.76	-2.304	-8.64	-25.2	34.056	9.9	3.744	-4.68	-23.76	27.72	15.48	3.168	-6.84	-28.8	29.808	10.98	2.592	-7.56	-20.88
5280256	36.828	13.59	2.736	-2.16	-22.32	28.656	11.52	4.608	1.08	-23.04	30.024	7.92	-1.728	-5.04	-22.32	21.168	8.82	-0.576	-4.68	-24.48	32.112	22.14	11.52	2.88	-18	22.896	11.34	0.864	-5.04	-29.52	23.688	17.64	5.472	-1.8	-25.2
5280234	26.496	10.17	1.584	-4.14	-25.2	36.504	21.6	10.944	10.44	-21.6	23.04	16.92	0	-5.76	-23.04	34.56	9.18	-0.576	-7.2	-24.48	27.792	12.24	7.2	2.88	-18.72	42.264	17.1	8.928	0.36	-20.88	19.152	8.28	-1.728	-5.4	-20.88
5280250	41.904	14.85	4.032	-0.18	-22.32	36.792	20.16	9.792	3.24	-19.44	23.04	7.56	-1.152	-3.6	-22.32	35.712	15.12	4.32	-1.44	-21.6	27.864	13.32	2.016	-3.6	-24.48	37.08	20.7	6.336	0.36	-20.16	45.432	32.04	17.856	9.36	-14.4
528251	38.7	15.12	4.608	0.72	-11.52	27.72	19.44	7.488	-0.72	-22.32	33.192	10.98	3.744	1.44	-17.28	37.368	15.66	6.336	-0.36	-23.76	36.144	19.62	9.216	3.24	-21.6	44.136	21.24	7.488	1.44	-19.44	33.192	14.04	1.728	0.36	-20.88
5280285	36.54	17.01	2.016	-0.36	-18	50.184	24.48	13.248	6.12	-15.84	43.704	24.48	11.808	2.52	-19.44	11.304	12.96	-12.672	-14.76	-34.56	39.528	18.9	7.2	2.52	-16.56	38.808	17.64	6.048	0.36	-19.44	48.672	19.44	9.216	3.6	-18
016859	34.416	11.88	6.624	-2.52	-27.36	31.608	11.16	-2.88	-9.36	-31.68	22.464	6.12	-0.576	-4.32	-29.52	27.792	10.8	2.88	-2.52	-25.92	17.784	11.52	3.168	-0.36	-20.16	30.744	12.24	9.792	-2.52	-25.2	39.6	18.54	11.808	1.08	-20.16
016860	40.896	11.88	4.032	-0.72	-26.64	26.568	5.04	-0.576	-5.76	-28.08	29.736	8.82	2.016	-1.44	-25.2	22.608	5.76	-0.864	-3.24	-24.48	54.648	21.96	13.248	4.32	-20.16	40.896	18	4.608	-1.8	-20.88	37.152	15.12	8.064	2.88	-28.8
016861	37.8	17.64	0	-1.44	-32.4	39.24	16.2	4.032	-1.44	-23.04	47.376	19.98	6.048	-0.72	-27.36	40.896	10.8	0.864	-2.52	-27.36	40.752	24.66	13.536	5.04	-20.88	52.848	24.66	14.4	5.76	-18	31.176	5.4	-2.016	-6.48	-26.64
016862	23.112	0.9	-3.168	-7.92	-25.92	26.28	3.96	-0.288	-3.96	-20.16	36.216	10.44	-0.864	-1.8	-30.24	33.984	11.16	0.288	-3.24	-28.08	43.128	12.6	6.624	-1.8	-24.48	35.136	16.74	8.064	0.72	-23.04	44.064	17.64	8.064	1.44	-22.32
018027	32.544	9.9	3.456	-2.88	-20.16	36.936	5.22	-0.576	-5.4	-28.8	38.016	24.66	14.688	-0.72	-20.16	35.496	11.16	0	-2.16	-28.8	61.704	33.12	17.28	9.72	-14.4	47.592	24.3	9.504	0.72	-21.6	55.296	21.6	6.912	3.24	-20.16
018028	37.512	15.12	4.032	0.72	-18.72	40.824	19.08	9.216	-0.36	-26.64	41.4	12.96	1.44	-1.8	-25.2	40.752	14.22	0.288	-0.36	-28.08	56.016	25.74	17.568	5.76	-16.56	52.56	23.22	11.52	8.28	-13.68	45.936	25.74	12.96	9.36	-17.28
018029	26.28	3.78	0.864	-1.8	-18.72	31.68	8.46	3.168	-2.52	-27.36	36.576	15.48	4.608	3.6	-27.36	22.392	8.28	0.864	-7.2	-28.8	47.304	18	10.368	6.12	-21.6	39.384	15.3	11.232	4.68	-26.64	46.8	20.52	8.064	8.28	-18.72
018032	32.76	16.74	13.536	1.8	-20.16	27.216	15.84	2.016	3.96	-29.52	16.128	9.54	0	0.72	-27.36	13.32	3.06	3.456	-3.24	-25.92	24.12	16.56	6.624	-1.8	-20.16	33.336	18.36	6.048	5.04	-22.32	21.96	24.66	11.808	1.08	-20.88
018033	20.592	15.12	2.304	-1.08	-24.48	18.72	4.5	-4.032	-7.56	-29.52	34.776	14.76	6.912	1.44	-28.8	42.264	14.22	7.488	0.72	-25.2	33.264	11.16	5.472	0.72	-21.6	59.832	32.58	17.568	11.16	-23.04	46.8	23.22	6.048	4.68	-22.32
018034	23.616	12.78	1.44	1.8	-26.64	40.824	16.92	7.776	2.16	-22.32	32.544	14.4	-0.576	-3.96	-28.8	37.008	21.6	10.368	5.4	-26.64	41.904	20.88	9.504	10.08	-20.16	55.944	22.86	10.944	7.2	-21.6	37.8	19.98	9.216	1.08	-25.92

## Sheet: OCR GAIN
Time (weeks)	W0	W2	W4	W6	W8	W10	W12
5280137	0.467996	0.601697	0.393487	0.3362	0.187896	0.504716	0.497833
5280150	0.490607	0.659062	0.36122	0.368807	0.368611	0.458985	0.57831
5280168	0.596376	0.600913	0.00753082	0.0273702	0.0118179	0.0616956	0.0977786
5280371	0.53024	0.814774	0.174273	0.174743	0.0769303	0.546242	0.478587
001910	0.260972	0.416098	0.340314	0.383414	0.327081	0.366645	0.328617
001911	0.529656	0.483852	0.287879	0.135887	0.314058	0.512024	0.55708
001912	0.469223	0.51629	0.389342	0.16587	0.354609	0.478537	0.529353
001914	0.578459	0.414831	0.179795	0.0197359	0.179732	0.288409	0.403385
001915	0.414056	0.606496	0.373729	0.231768	0.317978	0.501996	0.328012
017490	0.523215	0.531324	0.272598	0.0792792	0.403221	0.400138	0.325471
017492	0.513223	0.404634	0.366245	0.124654	0.260559	0.356512	0.384796
017494	0.612519	0.522509	0.239387	0.128763	0.170007	0.327595	0.3884
018360	0.283365	0.45479	0.337446	0.276714	0.309703	0.324697	0.521518
5280234	0.652708	0.549888	0.634106	0.6346	0.473953	0.543907	0.549978
5280250	0.589247	0.477577	0.577624	0.432621	0.399068	0.458622	0.50876
528251	0.566409	0.526181	0.445285	0.461976	0.554611	0.659974	0.490509
5280285	0.63867	0.628223	0.570622	0.502631	0.478658	0.643791	0.646451
016859	0.733449	0.306148	0.588388	0.663955	0.474456	0.413039	0.496617
016860	0.661021	0.566614	0.541581	0.422428	0.453941	0.512167	0.448898
016861	0.614209	0.525043	0.516695	0.62266	0.474067	0.519091	0.52281
016862	0.599726	0.737285	0.452954	0.387878	0.399856	0.428158	0.409752
018027	0.582678	0.393023	0.464826	0.302445	0.330452	0.415815	0.35865
018028	0.621662	0.444871	0.455534	0.469657	0.337587	0.427848	0.466004
018029	0.740307	0.657724	0.497857	0.467092	0.36051	0.711137	0.437748
018032	0.525936	0.470576	0.422774	0.438227	0.744374	0.410084	0.450565
018033	0.581727	0.520144	0.482105	0.497859	0.487382	0.449116	0.482003
018034	0.695873	0.629296	0.342224	0.536067	0.559799	0.470696	0.525818

## Sheet: OVAR GAIN
Time (weeks)	W0		W2		W4		W6		W8		W10		W12
Direction	CCW	CW	CCW	CW	CCW	CW	CCW	CW	CCW	CW	CCW	CW	CCW	CW
5280137	0.11875	0.0677	0.0743	0.0417	0.0673	0.0613	0.0431	0.0286	0.0613	0.063	0.0705	0.0826	0.192	0.1189
5280150	0.09725	0.06665	0.0513	0.0845	0.0662	0.0902	0.0393	0.0507	0.0478	0.0464	0.0713	0.0725	0.1012	0.1455
5280168	0.1862	0.19875	0.0189	0.0194	0.0104	0.0019	0.0172	0.0092	0.0142	0.0243	0.0112	0.0014	0.0177	0.0164
5280371	0.056	0.11565	0.1086	0.1211	0.0226	0.0233	0.0171	0.0097	0.0576	0.0585	0.0873	0.1027	0.0705	0.062
001910	0.0708	0.0945	0	0	0.0696	0.0766	0.0228	0.0205	0.0173	0.0383	0.0749	0.1039	0.0665	0.1547
001911	0.2928	0.2593	0.1809	0.1485	0.0522	0.0604	0.0306	0.0596	0.0381	0.0386	0.0725	0.0579	0.0575	0.2471
001912	0.2237	0.093	0.2553	0.0898	0.058	0.0405	0.0223	0.049	0.1527	0.1358	0.04	0.0513	0.1463	0.1009
001914	0.2815	0.2291	0.0284	0.0909	0.0081	0.0126	0.0149	0.0075	0	0	0.0181	0.0515	0.0248	0.16
001915	0.2791	0.1019	0.0455	0.0651	0.0183	0.0283	0.0086	0.0081	0.0517	0.0364	0.0684	0.0717	0.0449	0.23
017490	0.088	0.1156	0.1911	0.1092	0.0379	0.0642	0.0801	0.0876	0.088	0.0449	0.2301	0.1159	0.0767	0.097
017492	0.12	0.0925	0.1769	0.0825	0.0507	0.0446	0.0418	0.0471	0.0888	0.0399	0.046	0.0575	0.0574	0.0478
017494	0.0839	0.0628	0.1147	0.0763	0.0428	0.0475	0.0239	0.0103	0.0522	0.079	0.0627	0.0478	0.044	0.1003
018360	0.2264	0.2185	0	0	0.0598	0.0541	0.0046	0.0101	0.0485	0.0551	0.0979	0.1078	0.1058	0.0421
5280234	0.1061	0.0295	0.1111	0.1154	0.1085	0.3136	0.0924	0.1359	0.0776	0.1005	0.1129	0.1268	0.1547	0.1794
5280250	0.10955	0.07365	0.092	0.0936	0.1514	0.1133	0.1724	0.1574	0.0718	0.1193	0.113	0.0821	0.1145	0.0852
528251	0.06055	0.04675	0.246	0.1776	0.084	0.0803	0.1049	0.1674	0.1246	0.0951	0.1142	0.0958	0.0808	0.0653
5280285	0.08135	0.0512	0.3136	0.0966	0.1397	0.1441	0.2514	0.3117	0.1451	0.1136	0.1331	0.0659	0.1028	0.106
016859	0.1024	0.0664	0.1407	0.2831	0.1915	0.2756	0.1493	0.3537	0.1615	0.2215	0.1391	0.1535	0.1944	0.1588
016860	0.0908	0.0732	0.1414	0.2788	0.3198	0.176	0.1409	0.3435	0.1164	0.1408	0.1901	0.1676	0.18	0.218
016861	0.0779	0.064	0.2319	0.5824	0.1694	0.1933	0.143	0.2626	0.187	0.145	0.1877	0.2154	0.2301	0.1726
016862	0.0965	0.0947	0.3702	0.3331	0.2927	0.163	0.2062	0.2868	0.1447	0.0787	0.1116	0.0833	0.1421	0.1151
018027	0.134	0.2514	0.1476	0.1282	0.2191	0.2344	0.1722	0.2026	0.1119	0.124	0.1457	0.225	0.2594	0.1118
018028	0.1504	0.1075	0.1046	0.1271	0.1439	0.0903	0.2086	0.1606	0.0705	0.0951	0.0696	0.1427	0.0755	0.1577
018029	0.0818	0.0559	0.1088	0.1007	0.1052	0.1275	0.0846	0.1598	0.0708	0.0673	0.1763	0.0666	0.0744	0.0683
018032	0.2504	0.1593	0.2076	0.1463	0.1932	0.1015	0.0805	0.1551	0.1716	0.2648	0.2016	0.132	0.0663	0.1679
018033	0.1234	0.0768	0.1732	0.1743	0.1402	0.2487	0.1007	0.098	0.2314	0.0738	0.2314	0.1238	0.1534	0.1368
018034	0.165	0.1232	0.203	0.1266	0.1491	0.1954	0.1863	0.1143	0.097	0.1029	0.1166	0.1101	0.1244	0.1323
