# Supplementary material for: Multisensory gaze stabilization in response to subchronic alteration of vestibular type I hair cells
Source: eLife. 2023 Nov 29;12:RP88819. doi: 10.7554/eLife.88819 (PMC10686621; doi:10.7554/eLife.88819)
Supplement: Figure 2—source data 1. [file elife-88819-fig2-data1.xlsx]

## Sheet: VOR GAIN
Time (weeks)	WO					W2					W4					W6					W8					W10					W12
Frequency (Hz)	0.2	0.5	0.8	1	2	0.2	0.5	0.8	1	2	0.2	0.5	0.8	1	2	0.2	0.5	0.8	1	2	0.2	0.5	0.8	1	2	0.2	0.5	0.8	1	2	0.2	0.5	0.8	1	2
5280137	0.27	0.545	0.66	0.69	0.555	0.28	0.53	0.66	0.71	0.5	0.28	0.48	0.56	0.47	0.47	0.15	0.49	0.52	0.58	0.44	0.11	0.33	0.49	0.56	0.54	0.23	0.6	0.66	0.72	0.63	0.18	0.62	0.59	0.7	0.74
5280150	0.215	0.525	0.52	0.51	0.4	0.25	0.83	0.51	0.23	0.21	0.17	0.5	0.51	0.62	0.52	0.26	0.44	0.49	0.56	0.34	0.28	0.58	0.66	0.7	0.55	0.22	0.55	0.56	0.6	0.46	0.22	0.61	0.68	0.75	0.53
5280168	0.33	0.61	0.645	0.675	0.535	0.2	0.4	0.4	0.52	0.3	0.01	0.02	0	0	0.01	0.01	0.02	0.02	0.02	0.02	0	0	0.13	0.01	0.28	0.13	0.01	0.03	0.06	0.22	0.01	0.02	0.02	0.04	0.04
5280371	0.275	0.545	0.635	0.785	0.63	0.17	0.59	0.65	0.85	0.91	0.17	0.27	0.28	0.3	0.24	0.02	0.07	0.11	0.14	0.14	0.03	0.07	0.16	0.22	0.3	0.05	0.23	0.32	0.43	0.49	0.15	0.4	0.45	0.48	0.39
001910	0.18	0.36	0.34	0.25	0.46	0.25	0.53	0.66	0.81	0.89	0.13	0.41	0.49	0.74	0.74	0.05	0.19	0.21	0.33	0.5	0.06	0.18	0.26	0.46	0.58	0.19	0.34	0.43	0.55	0.72	0.17	0.46	0.51	0.53	0.68
001911	0.22	0.4	0.43	0.72	0.78	0.38	0.59	0.51	0.59	0.8	0.09	0.28	0.44	0.45	0.4	0.01	0.03	0.04	0.06	0.1	0.03	0.09	0.13	0.14	0.25	0.09	0.33	0.38	0.69	0.78	0.28	0.52	0.56	0.6	0.72
001912	0.19	0.38	0.49	0.54	0.67	0.18	0.56	0.61	0.64	0.99	0.09	0.41	0.41	0.41	0.44	0	0.08	0.11	0.1	0.14	0.02	0.07	0.15	0.15	0.37	0.02	0.06	0.4	0.32	0.41	0.02	0.24	0.27	0.4	0.56
001914	0.29	0.49	0.28	0.52	0.69	0.29	0.54	0.5	0.54	0.93	0.07	0.17	0.38	0.55	1.02	0	0.03	-0.04	0.05	0.03	0	0.04	0.05	0.09	0.18	0.01	0.02	0.09	0.1	0.41	0.01	0.06	0.1	0.24	0.41
001915	0.22	0.36	0.53	0.5	0.78	0.1	0.42	0.44	0.61	0.9	0.09	0.3	0.46	0.53	0.54	0.01	0.03	0.07	0.17	0.29	0.01	0.05	0.31	0.27	0.48	0.08	0.31	0.36	0.55	0.74	0.16	0.28	0.3	0.36	0.61
017490	0.37	0.57	0.53	0.65	0.76	0.31	0.66	0.69	0.87	0.95	0.13	0.38	0.48	0.51	0.71	0.08	0.35	0.49	0.63	0.78	0.05	0.2	0.37	0.56	0.71	0.02	0.4	0.41	0.44	0.78	0.05	0.31	0.48	0.69	1.05
017492	0.35	0.6	0.55	0.6	0.73	0.27	0.57	0.7	0.68	0.92	0.11	0.35	0.58	0.64	0.82	0.03	0.11	0.16	0.17	0.24	0.04	0.17	0.31	0.36	0.57	0.04	0.23	0.33	0.45	0.58	0.14	0.31	0.4	0.48	0.72
017494	0.16	0.44	0.45	0.58	0.7	0.23	0.66	0.69	0.89	0.91	0.1	0.14	0.24	0.27	0.23	0.03	0.04	0.06	-0.05	0.04	0.01	0.06	0.04	0.15	0.21	0.01	0.05	0.11	0.17	0.39	0.01	0.06	0.15	0.19	0.45
018360	0.13	0.36	0.41	0.54	0.49	0.06	0.36	0.46	0.55	0.64	0.16	0.37	0.65	0.58	0.86	0.19	0.34	0.39	0.37	0.54	0.15	0.41	0.61	0.64	0.67	0.14	0.42	0.53	0.76	1.01	0.19	0.47	0.48	0.54	0.66
5280234	0.23	0.525	0.545	0.67	0.43	0.15	0.49	0.48	0.55	0.44	0.35	0.65	0.57	0.45	0.35	0.41	0.76	0.77	0.88	0.78	0.39	0.73	0.76	0.74	0.61	0.22	0.49	0.36	0.4	0.32	0.42	0.77	0.78	0.74	0.63
5280250	0.165	0.425	0.505	0.57	0.425	0.25	0.53	0.56	0.59	0.46	0.35	0.66	0.64	0.67	0.54	0.52	0.51	0.57	0.5	0.28	0.3	0.64	0.57	0.68	0.51	0.24	0.56	0.56	0.61	0.48	0.11	0.39	0.5	0.47	0.49
5280251	0.215	0.48	0.565	0.575	0.405	0.29	0.53	0.6	0.66	0.55	0.33	0.69	0.68	0.89	0.54	0.25	0.43	0.57	0.54	0.36	0.24	0.45	0.53	0.54	0.43	0.28	0.54	0.62	0.58	0.48	0.37	0.74	0.81	0.91	0.73
5280285	0.245	0.48	0.61	0.7	0.43	0.17	0.47	0.51	0.55	0.58	0.16	0.48	0.53	0.42	0.4	0.43	0.51	0.59	0.78	0.79	0.28	0.62	0.58	0.63	0.5	0.36	0.77	0.76	0.81	0.53	0.17	0.5	0.6	0.68	0.57
016859	0.31	0.61	0.62	0.7	0.67	0.28	0.63	0.55	0.67	0.82	0.34	0.53	0.51	0.81	1.04	0.3	0.64	0.65	0.8	0.94	0.42	0.57	0.74	0.81	1.01	0.38	0.79	0.72	0.63	0.82	0.25	0.65	0.65	0.87	1.02
016860	0.26	0.69	0.52	0.62	0.62	0.25	0.61	0.56	0.73	0.8	0.26	0.74	0.81	0.83	0.99	0.27	0.5	0.56	0.67	0.96	0.12	0.51	0.54	0.67	0.76	0.25	0.67	0.75	0.71	0.87	0.23	0.58	0.6	0.63	0.54
016861	0.26	0.69	0.7	0.67	0.66	0.24	0.63	0.67	0.7	1.11	0.2	0.77	0.86	0.78	0.87	0.38	0.5	0.62	0.73	1.02	0.18	0.59	0.62	0.65	0.72	0.16	0.57	0.63	0.76	0.92	0.38	0.78	0.82	0.9	1.01
016862	0.35	0.62	0.54	0.63	0.6	0.32	0.58	0.56	0.72	0.92	0.27	0.64	0.64	0.73	0.92	0.34	0.83	0.63	0.85	0.82	0.25	0.75	0.68	0.81	0.83	0.16	0.49	0.65	0.81	0.99	0.26	0.47	0.64	0.53	0.76
018027	0.37	0.63	0.62	0.62	0.85	0.35	0.71	0.61	0.57	0.5	0.1	0.3	0.45	0.62	0.79	0.19	0.41	0.44	0.57	0.68	0.06	0.31	0.52	0.54	1.02	0.2	0.42	0.57	0.78	0.96	0.11	0.58	0.46	0.62	0.73
018028	0.27	0.63	0.73	0.71	0.82	0.22	0.53	0.5	0.54	0.74	0.22	0.57	0.55	0.73	0.66	0.2	0.51	0.54	0.69	0.53	0.09	0.3	0.34	0.75	1.13	0.12	0.48	0.54	0.68	1	0.09	0.5	0.61	0.48	0.72
018029	0.21	0.81	0.47	0.53	0.82	0.39	0.61	0.6	0.81	0.88	0.18	0.45	0.56	0.52	0.74	0.31	0.38	0.76	0.78	0.97	0.18	0.48	0.58	0.56	0.85	0.14	0.37	0.58	0.7	0.73	0.26	0.6	0.57	0.75	0.9
018032	0.17	0.38	0.22	0.42	0.55	0.15	0.3	0.36	0.42	0.81	0.22	0.48	0.46	0.79	0.71	0.27	0.39	0.51	0.67	0.85	0.23	0.69	0.57	0.65	0.97	0.25	0.54	0.62	0.76	0.89	0.14	0.36	0.45	0.53	0.8
018033	0.27	0.43	0.48	0.49	0.64	0.25	0.48	0.51	0.58	0.72	0.17	0.48	0.7	0.77	0.92	0.26	0.58	0.59	0.72	0.84	0.19	0.36	0.47	0.58	0.96	0.07	0.41	0.5	0.62	0.71	0.09	0.38	0.43	0.55	0.58
018034	0.25	0.42	0.46	0.56	0.77	0.25	0.38	0.55	0.72	1.03	0.18	0.5	0.52	0.56	0.71	0.13	0.38	0.53	0.52	0.64	0.14	0.45	0.6	0.57	0.32	0.14	0.43	0.54	0.75	0.89	0.16	0.37	0.48	0.5	0.68

## Sheet: OCR GAIN
Time (weeks)	W0	W2	W4	W6	W8	W10	W12
5280137	0.467996	0.601697	0.393487	0.3362	0.187896	0.504716	0.497833
5280150	0.490607	0.659062	0.36122	0.368807	0.368611	0.458985	0.57831
5280168	0.596376	0.600913	0.00753082	0.0273702	0.0118179	0.0616956	0.0977786
5280371	0.53024	0.814774	0.174273	0.174743	0.0769303	0.546242	0.478587
001910	0.260972	0.416098	0.340314	0.383414	0.327081	0.366645	0.328617
001911	0.529656	0.483852	0.287879	0.135887	0.314058	0.512024	0.55708
001912	0.469223	0.51629	0.389342	0.16587	0.354609	0.478537	0.529353
001914	0.578459	0.414831	0.179795	0.0197359	0.179732	0.288409	0.403385
001915	0.414056	0.606496	0.373729	0.231768	0.317978	0.501996	0.328012
017490	0.523215	0.531324	0.272598	0.0792792	0.403221	0.400138	0.325471
017492	0.513223	0.404634	0.366245	0.124654	0.260559	0.356512	0.384796
017494	0.612519	0.522509	0.239387	0.128763	0.170007	0.327595	0.3884
018360	0.283365	0.45479	0.337446	0.276714	0.309703	0.324697	0.521518
5280234	0.652708	0.549888	0.634106	0.6346	0.473953	0.543907	0.549978
5280250	0.589247	0.477577	0.577624	0.432621	0.399068	0.458622	0.50876
5280251	0.566409	0.526181	0.445285	0.461976	0.554611	0.659974	0.490509
5280285	0.63867	0.628223	0.570622	0.502631	0.478658	0.643791	0.646451
016859	0.733449	0.306148	0.588388	0.663955	0.474456	0.413039	0.496617
016860	0.661021	0.566614	0.541581	0.422428	0.453941	0.512167	0.448898
016861	0.614209	0.525043	0.516695	0.62266	0.474067	0.519091	0.52281
016862	0.599726	0.737285	0.452954	0.387878	0.399856	0.428158	0.409752
018027	0.582678	0.393023	0.464826	0.302445	0.330452	0.415815	0.35865
018028	0.621662	0.444871	0.455534	0.469657	0.337587	0.427848	0.466004
018029	0.740307	0.657724	0.497857	0.467092	0.36051	0.711137	0.437748
018032	0.525936	0.470576	0.422774	0.438227	0.744374	0.410084	0.450565
018033	0.581727	0.520144	0.482105	0.497859	0.487382	0.449116	0.482003
018034	0.695873	0.629296	0.342224	0.536067	0.559799	0.470696	0.525818
