# Supplementary material for: Multisensory gaze stabilization in response to subchronic alteration of vestibular type I hair cells
Source: eLife. 2023 Nov 29;12:RP88819. doi: 10.7554/eLife.88819 (PMC10686621; doi:10.7554/eLife.88819)
Supplement: Figure 3—source data 1. [file elife-88819-fig3-data1.xlsx]

## Sheet: Hair cells Count
Time (weeks)	W6
Structure	Horizontal Canal								Utricule
Region	Central				Peripheral				Central				Peripheral
Immuno Marker (type of HC)	Myo7a (all HC)	Spp1 (I HC)	Caspr1 (I HC)	Calretinin (II HC)	Myo7a (all HC)	Spp1 (I HC)	Caspr1 (I HC)	Calretinin (II HC)	Myo7a (all HC)	Spp1 (I HC)	Caspr1 (I HC)	Calretinin (II HC)	Myo7a (all HC)	Spp1 (I HC)	Caspr1 (I HC)	Calretinin (II HC)
5280168	68	15	7	11	96	47	31	23	94	9	5	38	120	36	26	46
5280176	61	12	4	11	69	33	16	22	106	28	21	47	123	56	37	48
5280230	48	4	2	8	91	36	24	22	82	32	8	34	130	37	23	50
5280135	51	0	0	14	66	3	0	26	65	0	0	42	113	0	1	48
5280162	57	11	1	13	93	38	27	25	78	28	8	38	142	42	36	59
5280170	56	7	0	11	95	31	20	30	84	12	7	32	141	29	27	55
5280174	55	4	0	12	82	17	7	23	112	5	2	34	92	25	9	42
5280139	81	48	40	12	105	62	63	24	108	52	48	30	143	76	72	53
5280154	83	48	49	15	116	78	79	30	112	62	56	39	137	73	70	54
5280203	72	42	35	14	111	72	70	28	100	56	52	34	138	81	79	56
5280379	77	43	36	16	95	63	63	30	118	58	56	42	141	77	72	51
Time (weeks)	W12
Structure	Horizontal Canal								Utricule
Region	Central				Peripheral				Central				Peripheral
Immuno Marker (type of HC)	Myo7a (all HC)	Spp1 (I HC)	Caspr1 (I HC)	Calretinin (II HC)	Myo7a (all HC)	Spp1 (I HC)	Caspr1 (I HC)	Calretinin (II HC)	Myo7a (all HC)	Spp1 (I HC)	Caspr1 (I HC)	Calretinin (II HC)	Myo7a (all HC)	Spp1 (I HC)	Caspr1 (I HC)	Calretinin (II HC)
5280137	64	34	32	13	93	62	55	27	85	51	47	26	137	62	59	51
5280150	81	47	41	18	93	56	61	20	103	58	48	41	140	66	58	55
5280168	60	30	24	11	87	54	51	27	54	6	2	39	64	10	5	47
5280371	58	34	23	15	89	49	48	24	90	42	39	35	134	72	65	46
5280146	62	38	35	20	78	48	45	22	98	59	54	32	140	70	65	52
5280167	78	51	44	12	103	65	62	28	93	52	40	32	142	70	62	56
5280195	65	37	32	15	84	42	35	27	87	47	32	28	138	64	52	51
5280164	52	22	13	18	72	37	30	24	86	40	34	42	108	51	47	42
5280234	77	45	43	13	111	78	70	26	131	76	58	44	145	78	74	59
5280250	72	42	38	17	101	61	58	25	115	66	57	38	142	76	73	54
5280251	83	53	44	17	117	71	69	28	116	62	56	31	158	85	64	57
5280185	78	45	42	12	108	72	65	26	112	54	52	37	147	73	68	57

## Sheet: VOR GAIN
Time (weeks)	W12
Frequency (Hz)	0.2	0.5	0.8	1	2
5280137	0.18	0.62	0.59	0.7	0.74
5280150	0.22	0.61	0.68	0.75	0.53
5280168	0.01	0.02	0.02	0.04	0.04
5280371	0.15	0.4	0.45	0.48	0.39
5280146	0.26	0.47	0.56	0.61	0.57
5280167	0.17	0.52	0.52	0.53	0.48
5280195	0.14	0.22	0.31	0.35	0.35
5280164	0.02	0.03	0.02	0.09	0.17
5280234	0.42	0.77	0.78	0.74	0.63
5280250	0.11	0.39	0.5	0.47	0.49
5280251	0.37	0.74	0.81	0.91	0.73
5280285	0.17	0.5	0.6	0.68	0.57
Time (weeks)	W6
Frequency (Hz)	0.2	0.5	0.8	1	2
5280168	0.05	0.14	0.21	0.25	0.32
5280176	0.23	0.49	0.6	0.66	0.65
5280230	0.03	0.06	0.11	0.2	0.35
5280135	0.06	0	0.01	0.03	0.01
5280162	0.24	0.43	0.49	0.71	0.46
5280170	0.05	0.1	0.13	0.22	0.32
5280174	0.04	0.06	0.11	0.12	0.09
5280139	0.29	0.63	0.75	0.79	0.68
5280154	0.28	0.64	0.67	0.79	0.66
5280203	0.22	0.53	0.54	0.59	0.45
5280379	0.12	0.42	0.54	0.54	0.34

## Sheet: OCR GAIN
Time (weeks)	W12
5280137	0.497833
5280150	0.57831
5280168	0.0977786
5280371	0.478587
5280146	0.6046
5280167	0.544636
5280195	0.625864
5280164	0.317611
5280234	0.549978
5280250	0.50876
5280251	0.490509
5280285	0.646451
Time (weeks)	W6
5280168	0.246966
5280176	0.406382
5280230	0.321235
5280135	0.170984
5280162	0.222215
5280170	0.330878
5280174	0.307959
5280139	0.382135
5280154	0.890554
5280203	0.859399
5280379	0.539182
