# Supplementary material for: Multisensory gaze stabilization in response to subchronic alteration of vestibular type I hair cells
Source: eLife. 2023 Nov 29;12:RP88819. doi: 10.7554/eLife.88819 (PMC10686621; doi:10.7554/eLife.88819)
Supplement: Figure 6—source data 1. [file elife-88819-fig6-data1.xlsx]

## Sheet: CGR GAIN
Time (weeks)	W12
Frequency (Hz)	0.2	0.5	1
5280137	0.71	0.79	0.71
5280150	0.68	0.79	0.68
5280168	0.28	0.19	0.17
5280371	0.58	0.64	0.63
5280146	0.71	0.8	0.87
5280167	0.52	0.75	0.88
5280195	0.38	0.62	0.72
5280164	0.11	0.09	0.05
5280133	0.6	0.83	0.84
5280144	0.23	0.25	0.21
5280266	0.55	0.65	0.62
5280325	0.13	0.27	0.17
5280317	0.75	0.92	0.83
5280263	0.9	0.95	0.89
5280255	0.72	0.8	0.81
5280254	0.82	0.92	0.87
5280234	0.77	0.84	0.93
5280250	0.71	0.83	0.83
528251	0.7	0.76	0.78
5280285	0.73	0.89	0.92
Time (weeks)	W6
Frequency (Hz)	0.2	0.5	1
5280168	0.48	0.6	0.73
5280176	0.68	0.82	0.66
5280230	0.24	0.35	0.29
5280135	0.08	0.12	0.14
5280162	0.49	0.75	0.76
5280170	0.33	0.26	0.25
5280174	0.34	0.52	0.54
5280139	0.87	0.96	0.98
5280154	0.73	0.97	0.92
5280203	0.53	0.75	0.87
5280379	0.8	0.93	0.97

## Sheet: CGR PHASE
Time (weeks)	W12
Frequency (Hz)	0.2	0.5	1
5280137	-0.576	-5.22	-15.48
5280150	-0.576	-6.48	-15.84
5280168	7.272	-10.44	-28.08
5280371	2.304	-3.6	-15.12
5280146	-0.576	-2.88	-14.76
5280167	1.08	-3.6	-12.96
5280195	5.76	-3.6	-16.92
5280164	23.328	8.1	-15.12
5280133	0.936	-3.24	-12.24
5280144	9.216	-0.72	-22.32
5280266	7.776	-2.16	-12.6
5280325	19.8	4.5	-16.2
5280317	-1.008	-4.86	-10.44
5280263	-1.8	-2.34	-14.76
5280255	-1.224	-4.68	-11.88
5280254	-0.504	-3.96	-10.8
5280234	-0.864	-5.22	-15.12
5280250	-1.872	-6.3	-14.76
528251	-2.448	-4.5	-12.24
5280285	0.432	-5.04	-13.32
Time (weeks)	W6
Frequency (Hz)	0.2	0.5	1
5280168	5.688	-1.08	-15.84
5280176	2.016	-5.22	-17.64
5280230	20.664	4.32	-6.48
5280135	17.496	1.44	-20.16
5280162	4.104	-4.5	-15.48
5280170	21.096	11.7	-4.68
5280174	16.2	0.54	-14.76
5280139	-0.864	-5.04	-14.04
5280154	0.216	-4.86	-15.12
5280203	2.664	7.56	-16.2
5280379	-0.432	-5.22	-15.84

## Sheet: CGR MODEL
GAIN				PHASE
5280137	0.74889	1.01546	0.949178	5280137	-1.728	-3.24	-11.16
5280150	0.729252	0.920049	0.951605	5280150	6.696	1.26	-6.84
5280168	0.42696	0.430459	0.366768	5280168	1.296	-31.32	-38.16
5280371	0.62174	0.764473	0.699023	5280371	5.112	-1.26	-20.16
5280146	0.799796	0.875333	0.924998	5280146	7.632	-6.48	-14.04
5280167	0.66688	0.812212	0.710427	5280167	8.784	1.26	-15.48
5280195	0.572586	0.547099	0.555161	5280195	8.424	-5.94	-14.76
5280164	0.461127	0.370032	0.186061	5280164	9.36	-23.76	-37.08
5280133	0.847368	0.979199	1.10564	5280133	2.376	-4.14	-15.12
5280144	0.559432	0.524439	0.531185	5280144	2.808	-25.2	-61.56
5280266	0.552993	0.624409	0.559978	5280266	4.32	-16.38	-27.36
5280325	0.516995	0.622642	0.524142	5280325	2.088	-15.3	-29.16
5280168	0.576175	0.550732	0.489572	5280168	-0.504	-19.8	-31.32
5280176	0.829623	0.903005	1.04082	5280176	-2.592	-10.26	-20.52
5280230	0.548714	0.497512	0.514761	5280230	-1.008	-24.12	-37.44
5280135	0.411119	0.42	0.432836	5280135	12.96	-22.68	-57.6
5280162	0.809804	0.877123	0.94448	5280162	0.288	-9	-15.12
5280170	0.549571	0.536089	0.406945	5280170	-2.664	-16.38	-28.08
5280174	0.51	0.398751	0.381276	5280174	-0.792	-22.68	-34.2
5280317	0.659364	0.861812	0.815451	5280317	0.144	-0.18	-7.92
5280263	0.74	1.01448	0.934729	5280263	0.072	3.96	-9.36
5280255	0.669916	0.747189	1.02992	5280255	1.512	2.88	-8.28
5280254	0.648276	0.812294	0.969225	5280254	-3.312	-1.26	-7.92
5280234	0.90788	1.0477	0.946684	5280234	-8.496	-8.46	-13.68
5280250	0.61984	0.730746	0.64164	5280250	4.68	-5.94	-21.6
5280251	0.78994	0.965982	1.05211	5280251	-3.96	-8.82	-12.24
5280285	0.69695	0.88165	0.831609	5280285	1.296	-5.22	-14.04
5280139	0.789826	0.995622	0.985667	5280139	-1.8	-9.72	-20.16
5280154	0.749192	0.880995	0.935446	5280154	2.592	3.6	-14.76
5280203	0.689928	0.768343	0.696596	5280203	-2.376	-5.58	-21.24
5280379	0.669433	0.811379	0.72901	5280379	-2.808	-12.78	-19.44

## Sheet: aVOR Reproducibility
	0,2 Hz	0,5 Hz	1 Hz
5280137	0.796811	0.934351	0.970425
5280150	0.938514	0.910996	0.982785
5280146	0.883312	0.929374	0.973394
5280167	0.811129	0.927602	0.972171
5280133	0.890951	0.968656	0.969214
5280176	0.677353	0.953817	0.941028
5280162	0.943157	0.950881	0.959744
5280195	0.897204	0.913583	0.916799
5280266	0.552339	0.712491	0.855865
5280168	0.799396	0.894386	0.945166
5280174	0.775429	0.715215	0.833546
5280371	0.896713	0.930709	0.918808
5280168	0.0635156	0.16654	0.150268
5280164	0.363359	0.00629378	0.243954
5280144	0.0607524	0.0676066	0.160339
5280325	0.144521	0.174527	0.452229
5280230	0.473826	0.636427	0.868725
5280135	0.734215	0.0463084	0.327876
5280170	0.685402	0.603196	0.736689
5280317	0.994182	0.945216	0.956924
5280255	0.918969	0.924399	0.993178
5280234	0.991741	0.947466	0.981996
5280250	0.950844	0.955215	0.986586
5280251	0.991274	0.950753	0.985092
5280285	0.848174	0.978144	0.991444
5280139	0.991447	0.980002	0.972412
5280154	0.931059	0.901641	0.96949
5280203	0.867488	0.969403	0.97282
5280379	0.937595	0.978502	0.968539
5280254	0.818987	0.982436	0.999984
5280263	0.951989	0.855675	0.992782

## Sheet: aVOR Sweep Amplitude
	0,2 Hz	0,5 Hz	1 Hz
5280137	3.08773	3.95518	2.50639
5280150	3.65164	3.70123	2.20447
5280146	4.11234	2.89055	1.82009
5280167	2.75526	3.36571	1.47182
5280133	2.96155	3.06545	2.3599
5280176	4.68859	3.1478	1.99356
5280162	4.12374	2.71426	2.20767
5280195	2.28912	1.24068	1.09243
5280266	1.48767	0.759474	0.738705
5280168	1.11487	0.848219	0.786397
5280174	0.83443	0.445231	0.43361
5280371	2.46564	2.42992	1.66376
5280168	0.740268	0.439253	0.36528
5280164	0.666124	0.452448	0.183064
5280144	0.85312	0.556468	0.448727
5280325	1.68308	0.88495	0.847242
5280230	0.556423	0.327658	0.657114
5280135	0.685325	0.360097	0.445814
5280170	1.22883	0.734273	0.771382
5280317	4.55585	3.68925	2.16128
5280255	4.93517	3.92525	2.67274
5280234	6.65717	4.56379	2.34463
5280250	2.24261	2.43788	1.42008
5280251	6.40923	4.24408	2.69394
5280285	2.61236	2.53299	1.9742
5280139	5.22914	3.45249	2.3326
5280154	4.46669	3.95329	2.24581
5280203	3.79333	2.97782	1.79729
5280379	2.28642	2.49848	1.67047
5280254	4.30072	3.63038	3.14624
5280263	4.50611	4.43896	2.32031
