# Supplementary material for: Multisensory gaze stabilization in response to subchronic alteration of vestibular type I hair cells
Source: eLife. 2023 Nov 29;12:RP88819. doi: 10.7554/eLife.88819 (PMC10686621; doi:10.7554/eLife.88819)
Supplement: Source data 1. [file elife-88819-data1.xlsx]

## Sheet: OKR GAIN
Time (weeks)	WO					W2					W4					W6					W8					W10					W12
Frequency (Hz)	0.1	0.2	0.33	0.5	1	0.1	0.2	0.33	0.5	1	0.1	0.2	0.33	0.5	1	0.1	0.2	0.33	0.5	1	0.1	0.2	0.33	0.5	1	0.1	0.2	0.33	0.5	1	0.1	0.2	0.33	0.5	1
5280137	0.455	0.53	0.5	0.44	0.32	0.53	0.46	0.46	0.37	0.33	0.65	0.56	0.62	0.57	0.37	0.6	0.58	0.52	0.53	0.43	0.65	0.65	0.63	0.6	0.54	0.64	0.58	0.63	0.63	0.51	0.52	0.57	0.58	0.47	0.34
5280150	0.505	0.405	0.405	0.35	0.265	0.35	0.38	0.39	0.29	0.23	0.46	0.4	0.45	0.52	0.32	0.56	0.51	0.49	0.48	0.43	0.68	0.47	0.61	0.53	0.43	0.45	0.32	0.33	0.38	0.24	0.58	0.52	0.45	0.37	0.25
5280168	0.545	0.53	0.47	0.43	0.295	0.41	0.41	0.36	0.33	0.23	0.24	0.31	0.31	0.34	0.29	0.53	0.34	0.33	0.31	0.36	0.45	0.47	0.53	0.5	0.52	0.41	0.45	0.49	0.43	0.41	0.52	0.43	0.51	0.45	0.37
5280371	0.475	0.52	0.53	0.39	0.335	0.55	0.48	0.46	0.4	0.36	0.57	0.5	0.5	0.55	0.49	0.48	0.46	0.54	0.49	0.45	0.55	0.52	0.54	0.58	0.57	0.56	0.56	0.66	0.5	0.4	0.55	0.48	0.51	0.49	0.42
5280146	0.54	0.52	0.51	0.455	0.34	0.53	0.42	0.29	0.26	0.2	0.5	0.51	0.6	0.5	0.41	0.48	0.47	0.56	0.55	0.44	0.68	0.56	0.66	0.61	0.44	0.72	0.57	0.61	0.49	0.33	0.49	0.54	0.56	0.51	0.45
5280167	0.515	0.515	0.505	0.38	0.285	0.53	0.51	0.38	0.33	0.27	0.47	0.34	0.52	0.4	0.29	0.56	0.58	0.58	0.43	0.4	0.57	0.61	0.64	0.48	0.39	0.51	0.48	0.56	0.44	0.33	0.58	0.51	0.5	0.4	0.31
5280195	0.395	0.44	0.425	0.375	0.295	0.53	0.53	0.46	0.42	0.27	0.53	0.58	0.61	0.45	0.41	0.32	0.35	0.41	0.41	0.42	0.4	0.5	0.56	0.5	0.46	0.43	0.5	0.53	0.5	0.39	0.53	0.45	0.53	0.41	0.35
5280164	0.505	0.485	0.52	0.42	0.375	0.53	0.55	0.41	0.27	0.23	0.49	0.5	0.41	0.42	0.38	0.45	0.33	0.44	0.39	0.39	0.47	0.43	0.52	0.42	0.46	0.32	0.39	0.42	0.47	0.35	0.39	0.46	0.46	0.4	0.25
5280133	0.535	0.55	0.53	0.38	0.29	0.48	0.61	0.62	0.58	0.41	0.56	0.57	0.63	0.63	0.37	0.58	0.59	0.69	0.56	0.51	0.58	0.61	0.57	0.59	0.42	0.74	0.61	0.77	0.62	0.54	0.63	0.67	0.67	0.58	0.54
5280144	0.59	0.58	0.57	0.47	0.41	0.65	0.5	0.38	0.44	0.35	0.54	0.54	0.58	0.48	0.62	0.45	0.48	0.59	0.62	0.58	0.47	0.55	0.65	0.59	0.55	0.49	0.54	0.65	0.57	0.57	0.49	0.53	0.63	0.53	0.57
5280266	0.545	0.505	0.495	0.43	0.38	0.66	0.64	0.65	0.53	0.44	0.55	0.5	0.67	0.57	0.57	0.48	0.48	0.58	0.55	0.61	0.42	0.48	0.6	0.56	0.57	0.52	0.62	0.68	0.65	0.54	0.57	0.53	0.67	0.59	0.52
5280325	0.62	0.515	0.51	0.425	0.355	0.5	0.56	0.6	0.48	0.39	0.48	0.54	0.56	0.49	0.49	0.4	0.39	0.43	0.48	0.48	0.48	0.39	0.49	0.56	0.49	0.42	0.43	0.54	0.47	0.51	0.35	0.47	0.53	0.54	0.41
5280317	0.53	0.49	0.475	0.415	0.285	0.5	0.43	0.34	0.37	0.32	0.55	0.52	0.56	0.46	0.41	0.53	0.5	0.41	0.31	0.22	0.61	0.55	0.53	0.52	0.39	0.58	0.44	0.37	0.38	0.32	0.45	0.37	0.28	0.28	0.15
5280263	0.5	0.49	0.445	0.39	0.285	0.51	0.35	0.3	0.33	0.24	0.53	0.53	0.41	0.37	0.29	0.57	0.52	0.51	0.41	0.32	0.64	0.62	0.57	0.47	0.36	0.59	0.56	0.51	0.34	0.27	0.47	0.47	0.41	0.33	0.27
5280255	0.58	0.525	0.495	0.435	0.37	0.42	0.51	0.38	0.29	0.3	0.62	0.45	0.62	0.45	0.41	0.61	0.51	0.45	0.37	0.33	0.59	0.56	0.49	0.41	0.27	0.55	0.43	0.42	0.3	0.25	0.45	0.37	0.36	0.21	0.2
5280254	0.475	0.49	0.48	0.41	0.34	0.44	0.34	0.33	0.23	0.19	0.55	0.46	0.55	0.32	0.28	0.5	0.51	0.43	0.34	0.29	0.58	0.51	0.43	0.36	0.32	0.6	0.52	0.49	0.41	0.25	0.53	0.36	0.34	0.24	0.22
5280136	0.59	0.5	0.455	0.405	0.335	0.37	0.44	0.41	0.35	0.25	0.55	0.56	0.51	0.43	0.3	0.37	0.54	0.42	0.34	0.25	0.57	0.46	0.4	0.35	0.21	0.5	0.48	0.35	0.31	0.27	0.53	0.41	0.44	0.32	0.3
5280172	0.5	0.49	0.495	0.4	0.34	0.51	0.49	0.45	0.35	0.31	0.57	0.46	0.39	0.39	0.25	0.57	0.63	0.59	0.48	0.36	0.52	0.49	0.5	0.31	0.25	0.64	0.58	0.58	0.43	0.33	0.49	0.53	0.51	0.44	0.29
5280199	0.545	0.49	0.505	0.435	0.385	0.4	0.49	0.43	0.39	0.3	0.61	0.57	0.45	0.43	0.34	0.64	0.58	0.48	0.41	0.25	0.55	0.53	0.51	0.4	0.25	0.59	0.51	0.41	0.45	0.29	0.5	0.47	0.5	0.47	0.27
5280256	0.54	0.46	0.485	0.43	0.38	0.51	0.56	0.5	0.41	0.36	0.63	0.53	0.57	0.46	0.35	0.67	0.68	0.66	0.54	0.37	0.57	0.54	0.48	0.41	0.29	0.56	0.62	0.6	0.44	0.31	0.59	0.63	0.62	0.51	0.39
5280234	0.6	0.57	0.57	0.5	0.375	0.47	0.46	0.4	0.42	0.3	0.52	0.54	0.36	0.4	0.24	0.51	0.45	0.51	0.36	0.28	0.5	0.38	0.38	0.43	0.22	0.49	0.4	0.46	0.39	0.28	0.47	0.5	0.41	0.3	0.23
5280250	0.47	0.505	0.46	0.385	0.3	0.59	0.45	0.41	0.37	0.28	0.58	0.46	0.43	0.44	0.33	0.57	0.5	0.5	0.38	0.26	0.58	0.52	0.44	0.42	0.3	0.53	0.52	0.46	0.4	0.32	0.58	0.51	0.51	0.43	0.33
5280251	0.475	0.425	0.41	0.37	0.28	0.43	0.44	0.44	0.38	0.28	0.56	0.41	0.4	0.35	0.27	0.49	0.41	0.42	0.4	0.27	0.6	0.42	0.37	0.31	0.2	0.41	0.48	0.5	0.38	0.3	0.48	0.42	0.49	0.3	0.24
5280285	0.575	0.55	0.56	0.495	0.325	0.41	0.53	0.49	0.4	0.45	0.57	0.51	0.43	0.4	0.29	0.55	0.55	0.47	0.4	0.34	0.66	0.49	0.45	0.42	0.26	0.53	0.51	0.51	0.46	0.35	0.62	0.53	0.52	0.42	0.26

## Sheet: OKR PHASE
Time (weeks)	WO					W2					W4					W6					W8					W10					W12
Frequency (Hz)	0.1	0.2	0.33	0.5	1	0.1	0.2	0.33	0.5	1	0.1	0.2	0.33	0.5	1	0.1	0.2	0.33	0.5	1	0.1	0.2	0.33	0.5	1	0.1	0.2	0.33	0.5	1	0.1	0.2	0.33	0.5	1
5280137	12.312	1.4184	-3.48084	-5.706	-45.576	5.76	-2.5056	-2.47104	-11.106	-37.476	13.68	2.6784	-2.11464	-6.246	-43.596	13.68	9.0864	-3.65904	-6.786	-43.596	12.024	4.0464	-0.68904	-8.586	-36.756	8.748	7.6464	-3.18384	0.234	-32.076	8.964	1.6704	-3.18384	-7.326	-32.436
5280150	3.888	-1.6416	-8.11404	-15.516	-43.056	10.98	2.5344	-5.08464	-15.246	-28.476	7.884	2.1024	-3.42144	-13.806	-42.156	5.652	2.6064	-4.49064	-12.546	-40.356	9.72	4.3344	-3.30264	-3.006	-48.636	12.6	5.5584	-9.59904	-22.806	-64.476	10.044	5.5584	-4.25304	-4.446	-24.156
5280168	9.306	3.2184	-9.36144	-9.756	-42.156	21.312	6.7104	-4.13424	-11.466	-67.716	32.508	11.5344	7.15176	4.374	-29.556	9.54	9.2304	5.84496	1.674	-49.356	13.968	7.4304	7.74576	11.394	-27.036	19.548	8.9424	9.52776	-0.666	-40.356	11.124	7.7184	-0.68904	-11.826	-30.636
5280371	7.416	1.1304	-3.71844	-10.296	-42.696	12.96	5.4864	-2.35224	-9.486	-30.276	7.236	4.6944	-6.74784	-1.926	-39.276	14.292	8.8704	-0.80784	-3.186	-47.196	9.216	9.5904	2.04336	-5.706	-39.996	16.02	6.7824	6.20136	-1.206	-38.556	12.672	5.1264	-0.68904	-8.226	-48.276
5280146	13.59	5.7744	-2.53044	-11.466	-51.516	14.112	4.1184	-3.42144	-14.166	-57.276	13.032	8.2944	-0.92664	0.774	-46.836	14.58	5.5584	0.49896	-14.346	-40.356	16.848	5.8464	-0.92664	-2.826	-29.916	12.456	8.6544	-3.54024	-3.906	-43.236	25.056	11.9664	-0.80784	-11.646	-34.596
5280167	9.792	2.8944	-4.37184	-15.066	-48.636	10.44	2.9664	-4.01544	-8.766	-52.956	14.832	4.6224	-4.25304	-14.886	-45.756	12.96	3.1104	-2.82744	-9.126	-45.756	17.136	6.0624	1.44936	-1.206	-30.996	14.544	5.0544	-2.35224	-17.406	-40.356	1.476	7.5744	-4.01544	-10.566	-44.676
5280195	8.604	2.5344	-5.38164	-8.496	-35.136	9.504	3.5424	-1.40184	-10.386	-44.316	4.824	1.9584	-2.82744	-8.406	-40.356	14.796	7.5744	7.38936	-3.186	-41.436	20.304	13.5504	9.52776	-4.986	-32.796	14.796	6.7104	1.44936	-0.846	-24.516	17.964	5.9904	-3.42144	-6.426	-38.196
5280164	7.938	2.5344	-6.03504	-12.816	-45.216	14.508	1.5984	-3.89664	-15.786	-30.276	24.048	12.0384	5.01336	-6.606	-30.276	10.62	9.0864	3.23136	-2.106	-46.476	23.4	11.1744	9.64656	-4.626	-21.636	13.14	12.6144	4.53816	-2.466	-29.196	16.128	12.1104	3.58776	-3.366	-39.996
5280133	8.784	3.0744	-5.08464	-13.266	-45.756	7.92	-0.5616	-6.86664	-8.226	-55.116	13.752	3.7584	1.33056	-3.906	-48.276	13.752	0.5184	-1.04544	-8.586	-42.156	12.42	4.6944	-1.63944	-8.586	-42.156	9.72	3.4704	-2.58984	-9.126	-45.036	10.044	5.1984	-3.06504	-8.046	-42.876
5280144	8.46	3.3264	-8.41104	-13.626	-46.116	5.976	4.5504	-1.28304	-5.886	-44.316	20.664	9.3024	3.58776	-11.826	-46.116	15.876	5.9904	3.70656	-2.106	-36.756	8.28	7.2864	6.79536	-7.686	-45.036	15.804	10.6704	2.99376	-4.626	-38.196	14.112	7.3584	1.21176	-5.886	-47.196
5280266	5.292	3.3264	-5.02524	-6.336	-35.316	12.492	3.6144	-2.23344	-8.766	-49.356	22.032	9.5184	0.02376	-2.106	-41.076	21.42	9.1584	2.99376	-1.566	-35.676	19.584	8.5824	6.08256	-2.826	-41.796	21.492	-0.7056	4.41936	-5.526	-43.236	11.628	7.4304	2.04336	-4.986	-37.836
5280325	7.776	-0.8136	-4.90644	-9.846	-43.416	14.976	3.5424	-0.09504	-13.446	-59.796	17.532	8.0784	0.85536	-1.026	-44.316	18.792	14.4864	5.72616	-0.306	-34.596	15.084	10.0944	6.79536	-5.886	-34.596	21.024	16.1424	3.46896	-5.346	-42.516	10.836	5.2704	1.33056	-6.066	-42.876
5280317	6.426	0.9864	-7.87644	-10.386	-43.956	2.7	6.4224	0.02376	-6.786	-48.636	6.768	3.6144	6.79536	-3.906	-33.516	10.512	3.4704	-3.06504	-11.106	-43.236	11.7	6.8544	2.99376	1.134	-33.156	13.428	6.2064	0.14256	-6.246	-41.796	11.664	3.0384	-8.17344	-8.226	-35.316
5280263	9.414	1.4544	-6.86664	-12.006	-44.856	7.452	3.0384	-5.55984	-12.186	-23.436	10.512	3.4704	-1.87704	-6.426	-29.196	11.556	3.9024	-4.49064	-12.366	-37.116	10.836	5.3424	0.85536	-8.046	-42.516	7.848	0.2304	-4.37184	-12.366	-50.076	9.504	5.2704	-1.75824	2.214	-38.196
5280255	7.884	3.8664	-4.07484	-9.126	-34.776	11.088	3.8304	-3.18384	-12.726	-47.556	7.992	7.8624	-2.11464	-3.906	-32.076	8.172	7.2864	-1.52064	-7.146	-45.036	11.628	7.6464	5.13216	5.814	-28.476	9.576	8.3664	-1.04544	-2.646	-41.436	10.116	5.8464	3.46896	-12.546	-39.276
5280254	10.656	3.9024	-5.85684	-7.416	-36.576	11.016	1.0944	-3.18384	-12.366	-37.836	10.656	3.1104	3.94416	-5.166	-37.836	10.908	4.9104	-1.63944	-11.826	-41.436	11.772	4.1184	2.75616	-1.026	-29.556	7.452	6.0624	-4.84704	-13.626	-44.676	13.5	5.5584	2.51856	-8.406	-32.796
5280136	11.394	-0.5256	-3.59964	-13.806	-40.536	2.412	0.8064	-2.23344	-14.166	-25.236	9.468	4.8384	-1.04544	-10.386	-54.036	11.016	1.7424	-2.70864	-7.506	-48.996	8.964	1.3104	-4.01544	-5.706	-35.316	15.804	6.8544	-9.36144	-9.126	-48.996	8.1	7.0704	0.38016	-8.226	-39.996
5280172	8.316	3.8664	-5.44104	-8.856	-48.456	12.852	4.6944	0.02376	-12.366	-42.876	13.464	7.5744	2.28096	-7.146	-42.876	15.012	8.2944	-1.40184	-7.506	-40.716	19.62	8.7264	5.72616	-6.426	-53.676	12.744	4.9104	5.25096	-7.506	-57.276	21.024	8.5104	2.39976	-9.666	-48.276
5280199	8.676	6.6384	-3.06504	-10.836	-40.716	-4.932	0.4464	-4.37184	-0.846	-43.956	7.956	2.9664	0.97416	-6.966	-29.916	12.744	3.2544	-4.37184	-6.966	-42.156	12.744	7.1424	1.68696	-5.706	-33.156	13.248	4.1184	-1.63944	-3.366	-41.076	13.896	3.6144	-5.79744	-8.766	-41.796
5280256	8.064	6.4224	-4.31244	-16.056	-48.816	9.864	4.8384	-3.54024	-18.666	-35.676	11.7	3.4704	-0.45144	-11.466	-43.596	10.584	4.3344	-0.09504	-9.126	-38.196	10.08	0.3744	-6.27264	-16.146	-43.956	14.4	3.8304	0.97416	-11.106	-47.196	15.048	5.9184	-2.82744	-8.946	-39.636
5280234	7.83	-0.0936	-6.03504	-11.196	-48.636	11.484	2.6784	-4.25304	-12.186	-32.436	10.404	2.4624	-5.44104	-9.666	-41.436	9.144	-3.0096	-1.28304	-3.906	-48.636	9.036	2.1744	-3.30264	-12.906	-43.596	6.912	8.5104	-2.94624	-11.466	-35.676	11.232	5.0544	-6.62904	-6.966	-22.356
5280250	7.758	0.9864	-7.75764	-16.506	-50.796	11.592	0.9504	-12.0938	-9.486	-51.876	6.336	2.1024	-5.32224	-8.046	-49.716	9.324	1.3104	0.26136	-3.546	-38.196	3.708	6.5664	-1.99584	-9.846	-45.036	5.832	2.3904	-3.18384	-15.066	-51.516	7.884	9.2304	0.14256	-11.106	-52.596
5280251	3.168	-2.9736	-6.09444	-9.126	-47.196	9.72	2.6064	-7.46064	-12.726	-56.196	8.676	4.9104	0.14256	-5.526	-34.956	10.548	-3.8736	2.04336	-18.846	-45.756	6.048	0.2304	0.02376	-22.266	-29.916	4.212	9.3024	-5.20344	-14.346	-40.356	11.844	1.8144	-10.193	-23.346	-46.476
5280285	8.082	1.2024	-7.99524	-13.806	-52.236	11.448	3.9744	-2.58984	-13.266	-38.916	9.54	4.5504	0.61776	-6.066	-42.516	12.852	1.7424	-6.27264	-11.466	-50.076	7.416	6.7824	-6.15384	-1.926	-38.196	11.232	2.7504	-4.60944	-13.626	-45.396	11.52	3.3984	-1.28304	-3.006	-46.476

## Sheet: VOR GAIN
Time (weeks)	WO					W2					W4					W6					W8					W10					W12
Frequency (Hz)	0.2	0.5	0.8	1	2	0.2	0.5	0.8	1	2	0.2	0.5	0.8	1	2	0.2	0.5	0.8	1	2	0.2	0.5	0.8	1	2	0.2	0.5	0.8	1	2	0.2	0.5	0.8	1	2
5280137	0.27	0.545	0.66	0.69	0.555	0.28	0.53	0.66	0.71	0.5	0.28	0.48	0.56	0.47	0.47	0.15	0.49	0.52	0.58	0.44	0.11	0.33	0.49	0.56	0.54	0.23	0.6	0.66	0.72	0.63	0.18	0.62	0.59	0.7	0.74
5280150	0.215	0.525	0.52	0.51	0.4	0.25	0.83	0.51	0.23	0.21	0.17	0.5	0.51	0.62	0.52	0.26	0.44	0.49	0.56	0.34	0.28	0.58	0.66	0.7	0.55	0.22	0.55	0.56	0.6	0.46	0.22	0.61	0.68	0.75	0.53
5280168	0.33	0.61	0.645	0.675	0.535	0.2	0.4	0.4	0.52	0.3	0.01	0.02	0	0	0.01	0.01	0.02	0.02	0.02	0.02	0	0	0.13	0.01	0.28	0.13	0.01	0.03	0.06	0.22	0.01	0.02	0.02	0.04	0.04
5280371	0.275	0.545	0.635	0.785	0.63	0.17	0.59	0.65	0.85	0.91	0.17	0.27	0.28	0.3	0.24	0.02	0.07	0.11	0.14	0.14	0.03	0.07	0.16	0.22	0.3	0.05	0.23	0.32	0.43	0.49	0.15	0.4	0.45	0.48	0.39
5280146	0.26	0.525	0.485	0.49	0.395	0.27	0.7	0.74	0.86	0.6	0.24	0.44	0.61	0.64	0.51	0.06	0.15	0.28	0.35	0.29	0.11	0.38	0.49	0.54	0.52	0.16	0.49	0.61	0.51	0.6	0.26	0.47	0.56	0.61	0.57
5280167	0.17	0.51	0.615	0.72	0.58	0.22	0.6	0.64	0.56	0.42	0.32	0.55	0.56	0.58	0.47	0.06	0.17	0.26	0.36	0.28	0.1	0.32	0.45	0.48	0.41	0.25	0.58	0.62	0.73	0.55	0.17	0.52	0.52	0.53	0.48
5280195	0.265	0.61	0.685	0.73	0.515	0.33	0.66	0.84	0.99	0.71	0.2	0.27	0.36	0.37	0.48	0.02	0.04	0.07	0.05	0.05	0.03	0.05	0.09	0.16	0.23	0.05	0.15	0.23	0.34	0.53	0.14	0.22	0.31	0.35	0.35
5280164	0.21	0.57	0.695	0.82	0.72	0.2	0.51	0.62	0.71	0.63	0.03	0.06	0.09	0.09	0.09	0	0	0.01	0.01	0.01	0.01	0.02	0	0.06	0.02	0	0.04	0.06	0.06	0.04	0.02	0.03	0.02	0.09	0.17
5280133	0.175	0.47	0.6	0.675	0.575	0.38	0.77	0.67	0.76	0.56	0.37	0.64	0.72	0.81	0.63	0.17	0.3	0.37	0.38	0.27	0.1	0.27	0.39	0.42	0.32	0.25	0.52	0.62	0.76	0.61	0.18	0.51	0.73	0.79	0.5
5280144	0.335	0.59	0.665	0.695	0.6	0.13	0.35	0.42	0.44	0.37	0.1	0.19	0.21	0.3	0.23	0.01	0.03	0.02	0.07	0.02	0.01	0.03	0.03	0.02	0.01	0.18	0.03	0.09	0.03	0.04	0.03	0.01	0.02	0.04	0.14
5280266	0.23	0.44	0.495	0.585	0.425	0.24	0.57	0.61	0.75	0.42	0.09	0.14	0.26	0.33	0.4	0.01	0.02	0.04	0.1	0.13	0.01	0.01	0.07	0.06	0.13	0.01	0.11	0.24	0.26	0.3	0.03	0.1	0.25	0.23	0.26
5280325	0.08	0.48	0.45	0.51	0.515	0.28	0.48	0.51	0.51	0.45	0.04	0.12	0.13	0.12	0.13	0	0.01	0.04	0.03	0.12	0.01	0	0.03	0.02	0.09	0.02	0.03	0.04	0.17	0.3	0.06	0.06	0.12	0.23	0.23
5280317	0.26	0.575	0.55	0.46	0.405	0.18	0.4	0.47	0.36	0.43	0.23	0.53	0.57	0.48	0.45	0.29	0.56	0.61	0.61	0.37	0.22	0.56	0.58	0.65	0.46	0.34	0.71	0.68	0.75	0.61	0.29	0.63	0.69	0.71	0.58
5280263	0.175	0.43	0.55	0.645	0.555	0.33	0.67	0.7	0.7	0.56	0.35	0.68	0.68	0.75	0.63	0.33	0.51	0.64	0.56	0.38	0.42	0.75	0.8	0.84	0.71	0.34	0.73	0.81	0.87	0.71	0.27	0.72	0.78	0.76	0.51
5280255	0.29	0.59	0.695	0.745	0.51	0.35	0.67	0.77	0.86	0.6	0.31	0.61	0.67	0.74	0.59	0.42	0.77	0.8	0.81	0.53	0.26	0.49	0.64	0.72	0.51	0.33	0.7	0.78	0.87	0.69	0.3	0.59	0.69	0.9	0.6
5280254	0.2	0.49	0.625	0.62	0.51	0.4	0.55	0.64	0.66	0.52	0.35	0.72	0.71	0.76	0.58	0.3	0.59	0.65	0.71	0.61	0.28	0.66	0.72	0.78	0.55	0.34	0.79	0.83	0.88	0.73	0.29	0.61	0.72	0.81	0.66
5280136	0.3	0.465	0.585	0.735	0.625	0.42	0.75	0.67	0.71	0.53	0.43	0.71	0.74	0.81	0.56	0.37	0.67	0.73	0.64	0.5	0.34	0.76	0.83	0.88	0.96	0.29	0.64	0.69	0.81	0.79	0.36	0.7	0.79	0.87	0.54
5280172	0.255	0.515	0.61	0.665	0.545	0.38	0.66	0.76	0.83	0.59	0.26	0.54	0.6	0.63	0.51	0.23	0.61	0.74	0.79	0.64	0.29	0.67	0.71	0.92	0.83	0.19	0.56	0.64	0.66	0.58	0.26	0.76	0.89	1.07	1.11
5280199	0.175	0.44	0.705	0.63	0.525	0.21	0.53	0.63	0.75	0.55	0.29	0.59	0.69	0.73	0.51	0.39	0.7	0.71	0.64	0.59	0.33	0.61	0.79	0.81	0.77	0.25	0.69	0.71	0.63	0.68	0.29	0.61	0.65	0.61	0.47
5280256	0.195	0.51	0.65	0.695	0.555	0.16	0.64	0.64	0.69	0.48	0.34	0.72	0.77	0.78	0.52	0.38	0.66	0.75	0.82	0.57	0.25	0.61	0.71	0.78	0.64	0.41	0.8	0.81	0.9	0.73	0.34	0.79	0.87	0.94	0.76
5280234	0.23	0.525	0.545	0.67	0.43	0.15	0.49	0.48	0.55	0.44	0.35	0.65	0.57	0.45	0.35	0.41	0.76	0.77	0.88	0.78	0.39	0.73	0.76	0.74	0.61	0.22	0.49	0.36	0.4	0.32	0.42	0.77	0.78	0.74	0.63
5280250	0.165	0.425	0.505	0.57	0.425	0.25	0.53	0.56	0.59	0.46	0.35	0.66	0.64	0.67	0.54	0.52	0.51	0.57	0.5	0.28	0.3	0.64	0.57	0.68	0.51	0.24	0.56	0.56	0.61	0.48	0.11	0.39	0.5	0.47	0.49
528251	0.215	0.48	0.565	0.575	0.405	0.29	0.53	0.6	0.66	0.55	0.33	0.69	0.68	0.89	0.54	0.25	0.43	0.57	0.54	0.36	0.24	0.45	0.53	0.54	0.43	0.28	0.54	0.62	0.58	0.48	0.37	0.74	0.81	0.91	0.73
5280285	0.245	0.48	0.61	0.7	0.43	0.17	0.47	0.51	0.55	0.58	0.16	0.48	0.53	0.42	0.4	0.43	0.51	0.59	0.78	0.79	0.28	0.62	0.58	0.63	0.5	0.36	0.77	0.76	0.81	0.53	0.17	0.5	0.6	0.68	0.57
